# Supplementary material for: Encapsulated stem cell–derived β cells exert glucose control in patients with type 1 diabetes
Source: Springer Nature journal article supplement (doi:10.1038/s41587-023-02055-5), 2023-11-27
Supplement: MOESM1 [file 41587_2023_2055_MOESM1_ESM.pdf]

# Encapsulated stem cell–derived $\beta$ cells exert glucose control in patients with type 1 diabetes

---

In the format provided by the  
authors and unedited

## Supplementary Information

**Supplementary Table 1. Patient characteristics at time of implantation and start immune suppression**

| Case | Gender | Age       |          | Weight   | BMI      | Insulin pump PreTx | Insulin Dose* |           | Period PreTx | Hypogl.Events |          | GMI      | HbA1c    | Immune Suppression Treatment |             |       |       |         |
|------|--------|-----------|----------|----------|----------|--------------------|---------------|-----------|--------------|---------------|----------|----------|----------|------------------------------|-------------|-------|-------|---------|
|      |        | onset T1D | Baseline | Baseline | Baseline |                    | Baseline mean |           | Dexcom G6    | Number preTx  |          | Baseline | Baseline | Thymoglobulin®               | Lymph.count | Tacro | MMF   |         |
|      |        | yrs       | yrs      | kg       | kg/m²    |                    | IU/day        | IU/kg/day | days         | Total         | per week | %        | %        | Start                        | Total Dose  | D1    | Start | Start   |
|      |        |           |          |          |          |                    |               |           |              |               |          |          |          | mg/kg                        | 10³/uL      |       |       | 1 g/day |
| 1    | F      | 15        | 51       | 68.6     | 23.2     | Medtronic 670G     | 18.4          | 0.27      | 15           | 0             | 0.00     | 7.7      | 7.4      | D -2                         | 2.9         | 0.2   | D -10 | D -10   |
| 2    | M      | 40        | 48       | 71       | 23.7     | No                 | 43.1          | 0.61      | 30           | 17            | 3.97     | 8.0      | 8.0      | D -2                         | 4.5         | 0.1   | D -6  | D -6    |
| 3    | F      | 14        | 41       | 60.5     | 19.8     | Medtronic 630G     | 27.1          | 0.36      | 30           | 13            | 3.03     | 7.3      | 8.5      | D -2                         | 3.0         | 0.2   | D -1  | D -1    |
| 4    | M      | 40        | 57       | 85.8     | 30.8     | No                 | 65.2          | 0.76      | 32           | 2             | 0.44     | 7.3      | 6.8      | D -2                         | 2.9         | 0.2   | D -1  | D -1    |
| 5    | M      | 13        | 61       | 87.3     | 27.2     | No                 | 57.1          | 0.65      | 18           | 8             | 3.11     | 7.3      | 7.9      | D -2                         | 2.9         | 0.4   | D -5  | D -5    |
| 6    | M      | 27        | 63       | 59.2     | 21.2     | No                 | 28.3          | 0.48      | 31           | 23            | 5.19     | 6.5      | 6.1      | D -2                         | 2.9         | 0.2   | D -1  | D -1    |
| 7    | F      | 5         | 59       | 47.5     | 20.5     | Medtronic 630G     | 25.8          | 0.54      | 30           | 0             | 0.00     | 8.1      | 8.4      | D -2                         | 3.1         | 0.3   | D -1  | D -1    |
| 8    | F      | 3         | 50       | 68.3     | 27.7     | Omnipod            | 45.5          | 0.67      | 30           | 0             | 0.00     | 7.8      | 7.4      | D -2                         | 2.9         | 0.1   | D -7  | D -7    |
| 9    | F      | 10        | 48       | 78.3     | 27.6     | Omnipod            | 26.2          | 0.33      | 23           | 11            | 3.35     | 7.1      | 8.0      | D -2                         | 2.9         | 0.3   | D -7  | D -7    |
| 10   | M      | 10        | 36       | 89.2     | 23.7     | Tandem Control IQ  | 37.1          | 0.42      | 30           | 1             | 0.23     | 6.7      | 6.8      | D -2                         | 2.9         | 0.2   | D -1  | D -1    |

Patients are ranked as in Table 1. PreTx mode of insulin treatment was maintained PostTx \* mean during minimally 2 weeks pre-implant  
Hypoglycemic events from CGM and/or patient-reported GMI= Glucose Management Indicator

These patients entered, and were followed for this study at City of Hope, The University of British Columbia, University of California-Davis, University of Minnesota, Vrije Universiteit Brussel (alphabetical order)

***Supplementary Table 2. Metabolic Parameters before (Pre) and following PEC-Direct Implant in recipients reaching the primary efficacy endpoint***

Post-implant data of CGM, Insulin dose, Carbohydrate intake were collected over 3-months prior to the quarterly end points. Pre- data cover the last two to four weeks. Number of severe hypoglycemic events at screening cover 12 months Pre, 3-month periods Post-implant. Other data are determined at indicated time points. N.A.= not available N.D.= not determined

Case 3 received Liraglutide from 2 weeks before month 3, started at 0.6 mg/day, progressively increased to 3 mg/day at month 6, followed by 3 doses of 3.6 mg/week till month 12.

|                                          | Case 1  |          |          |          |          | Case 2 |      |      |      |       | Case 3 |       |      |       |       | Case 4 |      |      |      |       |
|------------------------------------------|---------|----------|----------|----------|----------|--------|------|------|------|-------|--------|-------|------|-------|-------|--------|------|------|------|-------|
|                                          | Pre     | Mo 3     | Mo 6     | Mo 9     | Mo 12    | Pre    | Mo 3 | Mo 6 | Mo 9 | Mo 12 | Pre    | Mo 3  | Mo 6 | Mo 9  | Mo 12 | Pre    | Mo 3 | Mo 6 | Mo 9 | Mo 12 |
| <b>CGM Data</b>                          |         |          |          |          |          |        |      |      |      |       |        |       |      |       |       |        |      |      |      |       |
| Number of days recorded                  | 15      | 81       | 98       | 91       | 91       | 30     | 90   | 90   | 90   | 90    | 30     | 90    | 90   | 90    | 90    | 32     | 81   | 77   | 112  | 91    |
| % of time recorded                       | 95      | 94       | 99       | 99       | 98       | 96     | 95   | 95.9 | 96.9 | 97.4  | 82.5   | 87.4  | 92.7 | 85.6  | 84.7  | 93     | 98   | 98   | 97   | 97    |
| Mean glycemia (mg/dl)                    | 182     | 171      | 157      | 158      | 144      | 211    | 187  | 167  | 152  | 155   | 169.2  | 156.6 | 144  | 145.8 | 158.4 | 165    | 148  | 147  | 161  | 158   |
| Gluc. Manag. Indicator (GMI) (mmol/mol)  | 60.2    | 57.3     | 53.8     | 54.0     | 50.4     | 67.9   | 61.6 | 56.4 | 52.4 | 53.2  | 56.9   | 53.7  | 50.4 | 50.8  | 54.1  | 55.9   | 51.5 | 51.1 | 54.7 | 53.9  |
| (%)                                      | 7.7     | 7.4      | 7.1      | 7.1      | 6.8      | 8.4    | 7.8  | 7.3  | 6.9  | 7     | 7.4    | 7.1   | 6.8  | 6.8   | 7.1   | 7.3    | 6.9  | 6.8  | 7.2  | 7.1   |
| Glycemic variability (% CV)              | 30      | 29       | 32       | 28       | 27       | 40.4   | 40.9 | 38.6 | 37.7 | 37.7  | 29.7   | 31.6  | 31.4 | 30.3  | 31.3  | 35     | 39   | 37   | 38   | 39    |
| Percent readings                         |         |          |          |          |          |        |      |      |      |       |        |       |      |       |       |        |      |      |      |       |
| Time above range (TAR): > 250 mg/dl      | 11      | 7        | 6        | 4        | 1        | 33     | 22   | 11   | 6    | 6     | 7      | 6     | 2    | 2     | 4     | 10     | 6    | 5    | 9    | 9     |
| 181-250 mg/dl                            | 33      | 30       | 19       | 22       | 13       | 28     | 27   | 29   | 23   | 24    | 30     | 25    | 18   | 17    | 27    | 27     | 21   | 20   | 26   | 23    |
| Time in range (TIR): 71-180 mg/dl        | 55      | 63       | 74       | 74       | 85       | 36     | 48   | 56   | 67   | 66    | 62     | 68    | 79   | 80    | 68    | 59     | 68   | 71   | 61   | 63    |
| Time below range (TBR): 54-70 mg/dl      | 0       | 0        | 1        | 0        | 1        | 3      | 2    | 3    | 3    | 3     | 1      | 1     | 1    | 1     | 1     | 3      | 5    | 4    | 3    | 4     |
| < 54 mg/dl                               | 0       | 0        | 0        | 0        | 0        | 0      | 1    | 1    | 1    | 1     | 0      | 0     | 0    | 0     | 0     | 1      | 0    | 0    | 0    | 1     |
| Number of severe hypoglycemic events     | 0       | 0        | 0        | 0        | 0        | 0      | 0    | 0    | 0    | 0     | 1      | 0     | 0    | 0     | 0     | 0      | 0    | 0    | 0    | 0     |
| <b>Mean Insulin Dose</b>                 |         |          |          |          |          |        |      |      |      |       |        |       |      |       |       |        |      |      |      |       |
| Number of days recorded                  | 15      | 81       | 90       | 90       | 90       | 30     | 90   | 90   | 90   | 90    | 30     | 90    | 90   | 90    | 90    | 22     | 80   | 77   | 111  | 92    |
| Total insulin (mean IU/day)              | 18.4    | 29.5     | 34.7     | 30.6     | 19.9     | 46.5   | 46.5 | 42.5 | 42.7 | 40.2  | 27.1   | 28.9  | 21.4 | 16.6  | 22.8  | 88.5   | 88.3 | 80.5 | 77.5 | 77.1  |
| Basal insulin (mean IU/day)              | 9.2     | 12.9     | 15.5     | 12.8     | 9.9      | 22.9   | 23.5 | 20   | 17.2 | 23.7  | 20.4   | 18.7  | 14.9 | 10.9  | 12.6  | 46.5   | 47.4 | 45.9 | 45.0 | 46.0  |
| (% total)                                | 50      | 44       | 45       | 42       | 50       | 49     | 51   | 47   | 40   | 59    | 75     | 65    | 70   | 66    | 55    | 53     | 54   | 57   | 58   | 60    |
| Bolus insulin (mean IU/day)              | 9.2     | 16.6     | 19.2     | 17.8     | 10.0     | 23.6   | 22.9 | 22.5 | 25.5 | 16.5  | 6.7    | 10.2  | 6.5  | 5.7   | 10.2  | 42.0   | 40.9 | 34.6 | 32.5 | 31.1  |
| (% total)                                | 50      | 56       | 55       | 58       | 50       | 51     | 49   | 53   | 60   | 41    | 25     | 35    | 30   | 34    | 45    | 47     | 46   | 43   | 42   | 40    |
| Total insulin (mean IU/day/kg)           | 0.27    | 0.40     | 0.46     | 0.40     | 0.26     | 0.65   | 0.63 | 0.59 | 0.57 | 0.55  | 0.45   | 0.45  | 0.37 | 0.32  | 0.44  | 1.03   | 1.04 | 0.98 | 0.93 | 0.94  |
| <b>Daily carbohydrates (g mean ± SD)</b> | 86 ± 50 | 185 ± 70 | 185 ± 81 | 185 ± 82 | 113 ± 85 | N.A.   | N.A. | N.A. | N.A. | N.A.  | N.A.   | N.A.  | N.A. | N.A.  | N.A.  | N.A.   | N.A. | N.A. | N.A. | N.A.  |
| <b>Body weight (kg)</b>                  | 68.6    | 73.0     | 75.2     | 76.6     | 77.0     | 71.5   | 74   | 72   | 74.4 | 72.8  | 60.5   | 64.5  | 57.3 | 51.3  | 51.3  | 85.8   | 84.6 | 82.4 | 83.2 | 81.8  |
| <b>BMI (kg/m<sup>2</sup>)</b>            | 23.2    | 24.7     | 25.4     | 25.9     | 26.0     | 24.6   | 25.5 | 24.8 | 25.6 | 25.1  | 19.8   | 22.2  | 18.7 | 17.7  | 17.7  | 30.8   | 30.3 | 29.6 | 29.8 | 29.3  |
| <b>Serum creatinine (μmol/L)</b>         | 72      | 74       | 71       | 69       | 75       | 76     | 73   | 96   | 78   | 89    | 84     | 80    | 86   | 81    | 87    | 91     | 114  | 105  | 113  | 116   |
| <b>Hematocrit (L/L)</b>                  | 0.34    | 0.35     | 0.35     | 0.37     | 0.37     | 0.47   | 0.37 | 0.34 | 0.40 | 0.37  | 0.38   | 0.41  | 0.41 | 0.38  | 0.38  | 0.39   | 0.35 | 0.37 | 0.37 | 0.38  |
| <b>Hemoglobin total (g/L)</b>            | 108     | 109      | 114      | 112      | 112      | 159    | 124  | 117  | 133  | 126   | 124    | 133   | 138  | 127   | 124   | 137    | 118  | 121  | 117  | 125   |
| <b>HbA1c (%)</b>                         | 7.4     | 6.4      | 6.9      | 6.6      | 6.9      | 8      | 6.7  | 6.1  | N.D. | 6.1   | 8.5    | N.D.  | 6.7  | N.D.  | 6.9   | 6.8    | 5.8  | 5.5  | 6.0  | 5.9   |

**Supplementary Table 3. Metabolic Parameters before (Pre) and following PEC-Direct Implant in recipients not reaching the primary efficacy endpoint**

Post-implant data of CGM, Insulin dose, Carbohydrate intake were collected over 3-months prior to the quarterly end points. Pre- data cover the last two to four weeks. Other data are determined at indicated time points. N.A.= not available N.D.= not determined

CGM percent readings TAR > 180 mg/dl, TIR 71-180 mg/dl, TBR > 70 mg/dl

|                                     | Case 5 |      |      |      | Case 6 |      |      |      |       | Case 7 |      |      |      | Case 8 |      |      |      | Case 9 |      |      |      | Case 10 |      |      |
|-------------------------------------|--------|------|------|------|--------|------|------|------|-------|--------|------|------|------|--------|------|------|------|--------|------|------|------|---------|------|------|
|                                     | Pre    | Mo 3 | Mo 6 | Mo 9 | Pre    | Mo 3 | Mo 6 | Mo 9 | Mo 12 | Pre    | Mo 3 | Mo 6 | Mo 9 | Pre    | Mo 3 | Mo 6 | Mo 9 | Pre    | Mo 3 | Mo 6 | Mo 9 | Pre     | Mo 3 | Mo 6 |
| <b>CGM Data</b>                     |        |      |      |      |        |      |      |      |       |        |      |      |      |        |      |      |      |        |      |      |      |         |      |      |
| Mean glycemia (mg/dl)               | 173    | 151  | 154  | 157  | 135    | 161  | 136  | 136  | 137   | 205    | 182  | 182  | 209  | 171    | 167  | 146  | 104  | 173    | 166  | 176  | 176  | 145     | 135  | 141  |
| Gluc. Manag. Indic. (GMI) (%)       | 7.4    | 6.9  | 7.0  | 7.1  | 6.5    | 7.2  | 6.6  | 6.6  | 6.6   | 8.2    | 7.6  | 7.7  | 8.3  | 7.4    | 7.3  | 6.8  | 6.7  | 7.5    | 7.3  | 7.5  | 7.5  | 6.8     | 6.5  | 6.7  |
| Glycemic variability (% CV)         | 31.2   | 36.6 | 36.5 | 33.5 | 40     | 37   | 35   | 32   | 34    | 40.5   | 37.5 | 38.5 | 34.5 | 33.8   | 32.2 | 36.4 | 34.5 | 45.6   | 40.9 | 41.1 | 43.9 | 27.3    | 31.7 | 32.3 |
| Percent readings                    |        |      |      |      |        |      |      |      |       |        |      |      |      |        |      |      |      |        |      |      |      |         |      |      |
| Time above range (TAR)              | 42     | 25   | 27   | 30   | 20     | 33   | 17   | 15   | 18    | 55     | 46   | 48   | 62   | 37     | 36   | 21   | 17   | 36     | 34   | 43   | 40   | 15      | 14   | 18   |
| Time in range (TIR)                 | 57     | 73   | 71   | 68   | 73     | 64   | 80   | 83   | 78    | 43     | 52   | 50   | 37   | 63     | 63   | 77   | 81   | 60     | 63   | 54   | 57   | 83      | 83   | 80   |
| Time below range (TBR)              | 1      | 2    | 2    | 2    | 7      | 2    | 4    | 2    | 4     | 2      | 2    | 2    | 1    | 0      | 1    | 2    | 2    | 4      | 3    | 3    | 3    | 2       | 3    | 2    |
| <b>Insulin dose</b> (IU/day/kg)     | 0.71   | 0.80 | 0.82 | 0.81 | 0.48   | 0.51 | 0.52 | 0.54 | 0.51  | 0.60   | 0.50 | 0.42 | 0.44 | 0.52   | 0.61 | 0.58 | 0.53 | 0.39   | 0.40 | 0.40 | 0.35 | 0.45    | 0.47 | 0.45 |
| <b>Daily carbohydrates</b> (g mean) | N.A.   | N.A. | N.A. | N.A. | N.A.   | N.A. | N.A. | N.A. | N.A.  | N.A.   | N.A. | N.A. | N.A. | 162    | 192  | 128  | 94   | N.A.   | N.A. | N.A. | N.A. | N.A.    | N.A. | N.A. |
| <b>Body weight</b> (kg)             | 87.3   | 86.2 | 85.9 | 84.0 | 59.2   | 59.0 | 59.6 | 59.4 | 59.6  | 47.5   | 49.5 | 52.2 | 52.1 | 68.3   | 72.2 | 75.0 | 74.0 | 78.3   | 77.4 | 77.2 | 78.5 | 89.2    | 88.0 | 89.5 |
| <b>Serum creatinine</b> (μmol/L)    | 85     | 111  | 105  | 106  | 68     | 110  | 105  | 98   | 97    | 74     | 80   | 99   | 87   | 60     | 84   | 117  | 172  | 73     | 89   | 79   | 65   | 66      | 81   | 76   |
| <b>Hemoglobin</b> total (g/L)       | 128    | 124  | 119  | 125  | 134    | 120  | 126  | 129  | 127   | 127    | 107  | 102  | 107  | 123    | 86   | 108  | 99   | 127    | 116  | 115  | 114  | 146     | 138  | 149  |
| <b>HbA1c</b> (%)                    | 7.8    | N.D. | 6.8  | N.D. | 6.1    | N.D. | 5.5  | N.D. | 5.6   | 8.4    | N.D. | 7.1  | N.D. | 7.4    | N.D. | 6.2  | N.D. | 8.0    | N.D. | 7.5  | N.D. | 6.8     | N.D. | 6.4  |

***Supplementary Table 4. Comparison of changes in CGM-endpoints for glucose control measured in the group of cases that meet efficacy endpoints for implant function with those in the group of cases that do not meet these endpoints***

| Efficacy Endpoints     | TIR (%)            |                        |                        | TAR (%)            |                        |                        | GMI (%)               |                           |                           |
|------------------------|--------------------|------------------------|------------------------|--------------------|------------------------|------------------------|-----------------------|---------------------------|---------------------------|
|                        | Pre-Tx             | month 6                | month 9                | Pre-TX             | month 6                | month 9                | Pre-Tx                | month 6                   | month 9                   |
| <b>Yes : Cases 1-3</b> | <b>55</b> (36; 62) | <b>+ 19</b> (+17; +20) | <b>+ 19</b> (+18; +31) | <b>44</b> (37; 61) | <b>- 19</b> (-21; -17) | <b>- 18</b> (-32; -18) | <b>7.7</b> (7.4; 8.4) | <b>- 0.6</b> (-0.9; -0.6) | <b>- 0.6</b> (-1.5; -0.6) |
| <b>No : Cases 4-10</b> | <b>60</b> (57; 73) | <b>+ 7</b> (-3; +14)   | <b>+ 6</b> (-4; +13)   | <b>37</b> (20; 42) | <b>- 7</b> (-15; +3)   | <b>- 4</b> (-14; +5)   | <b>7.4</b> (6.8; 7.5) | <b>- 0.4</b> (-0.5; 0)    | <b>- 0.1</b> (-0.4; +0.1) |
|                        |                    | P = 0.008              | P = 0.036              |                    | P = 0.017              | P = 0.095              |                       | P = 0.042                 | P = 0.083                 |

\* MMTT-induced plasma C-peptide > baseline at month 6 with levels  $\geq 0.1$  nmol/l up to month 12.  
median (Q1;Q3) values for baseline (Pre-Tx) and for changes versus baseline (n=10 at month 6, n=9 at month 9)  
comparison of groups by two-tailed, unpaired Mann-Whitney tests; statistical significance for  $P \leq 0.05$

***Supplementary Table 5.***

Outcome of device-delivered stem cell-generated beta cell implants was examined in immune-compromised nude rats following the same experimental design as for device-encapsulated hu-PSC-PE implants in immune-compromised mice (12, 39). Protocol and procedures were approved by the Ethical Committee of VUB and carried out according to European Community Council Directive (86/609/EEC). Each rat received a subcutaneous open device that had been filled with  $7.10^6$  hu-ESC-PE cells at ViaCyte before shipment to Brussels where the study was conducted. Recipients were followed for appearance of plasma human (hu)-C-peptide and glucose-dependent changes in this level. A group of five rats were followed over 55 to 60 weeks before retrieval of the device for histological analysis as described in Methods and in previous reports (39, 40). The composition of the inner chamber was examined as for devices from cases 1 and 4, with measurement of the cell mass that corresponds to donor cells and of the insulin-positive cell mass. Rats are ranked according to their plasma hu-C-peptide levels at min 60 following an intraperitoneal (IP) glucose load between PT-week 40 and 60; three IP-glucose tests were performed during this period. The percent recovery of donor cells expresses the balance between cell loss following implantation and expansion of surviving cells. Expansion of donor cells in implants 3 to 5 contributed to a 2- to 4-fold higher donor cell mass than at start, with formation of an insulin-positive cell mass that was 12- to 18-fold higher than that in the month 6-device of case 1. Data confirm variability in donor cell survival and beta cell formation in subcutaneous devices containing hu-PSC-PE cells (39, 40).

| Nude Rat | IP-glucose-induced<br>plasma hu-C-peptide<br><br>PT wk 40-60<br>min 60 nmol/l | Donor cell mass at PT wk 55-60      |                            |            |
|----------|-------------------------------------------------------------------------------|-------------------------------------|----------------------------|------------|
|          |                                                                               | Relative to cell mass at start<br>% | Insulin-positive cell mass |            |
|          |                                                                               |                                     | μl                         | μl / kg BW |
| 1        | < LOD = 0.05                                                                  | 0                                   | 0                          | 0          |
| 2        | 0.5, 0.7, 0.5                                                                 | 103                                 | 0.85                       | 1.44       |
| 3        | 0.7, 1.3, 1.6                                                                 | 232                                 | 3.02                       | 6.25       |
| 4        | 3.8, 1.7, 2.6                                                                 | 271                                 | 3.64                       | 6.74       |
| 5        | 2.4, 6.7, 2.4                                                                 | 380                                 | 2.51                       | 4.56       |



*Supplementary Figure 1. Lymphocyte phenotypes in implants at Month 6 from case 1*

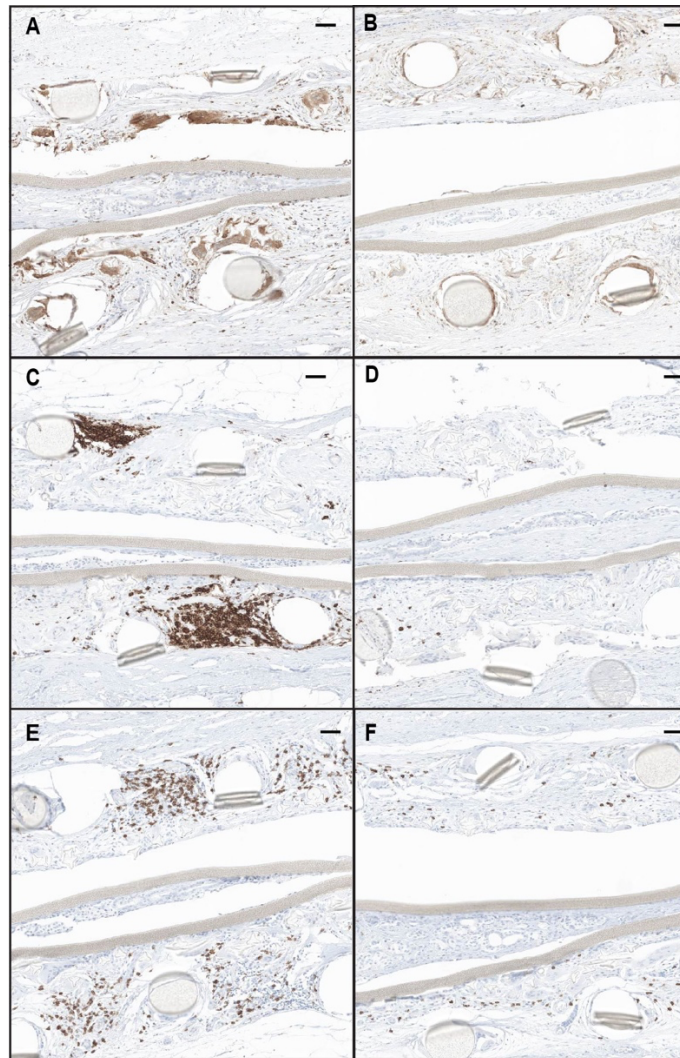

Immune-staining for CD4, CD8, CD20, CD68-positive cells indicated that the inner chamber exhibited a low density of single lymphocytes without signs of accumulation (A-F). The tissue outside the chamber presented CD68-positive cells clustered around the structural mesh, with varying density (A, B); in few segments, these clusters were associated with CD20-positive clusters (C,D), and less frequently with CD8-positive cells (E,F). CD4-positive cells were rarely observed and never occurred in clusters. These observations were made in each of the two retrieved devices.

Scale bar = 50  $\mu$ m.
